# Supplementary material for: The autophagy gene Atg16l1 differentially regulates Treg and TH2 cells to control intestinal inflammation
Source: eLife journal article supplement (doi:10.7554/elife.12444), 2016-02-24
Supplement: supp [file elife_poa_e12444_Figure_2_figure_supplement_3.pdf › elife_poa_e12444_Figure_2_figure_supplement_3.pdf]

Figure 2 is a scatter plot showing the percentage of eosinophils in the Spleen and mLN. The y-axis is labeled 'eosinophils (%)' and ranges from 0 to 2.0. The x-axis has two categories: 'Spleen' and 'mLN'. A vertical dotted line separates the two groups. The Spleen group has a mean line at approximately 0.8% and a single asterisk (\*) above it. The mLN group has a mean line at approximately 0.35% and two asterisks (\*\*) above it.

Scatter plot showing MCPT-1 levels (μg/ml) for *Atg16l1<sup>fl/fl</sup>* (black circles) and *Atg16l1<sup>ΔCD4</sup>* (grey circles) mice. The y-axis ranges from 0 to 0.3. The *Atg16l1<sup>fl/fl</sup>* group shows very low levels (near 0), while the *Atg16l1<sup>ΔCD4</sup>* group shows significantly higher levels (around 0.13-0.25). A horizontal line indicates the mean for the *ΔCD4* group. A double asterisk (\*\*) indicates statistical significance.
