# Supplementary figures and images for: The autophagy gene Atg16l1 differentially regulates Treg and TH2 cells to control intestinal inflammation
Source: eLife journal article supplement (doi:10.7554/elife.12444), 2016-02-24

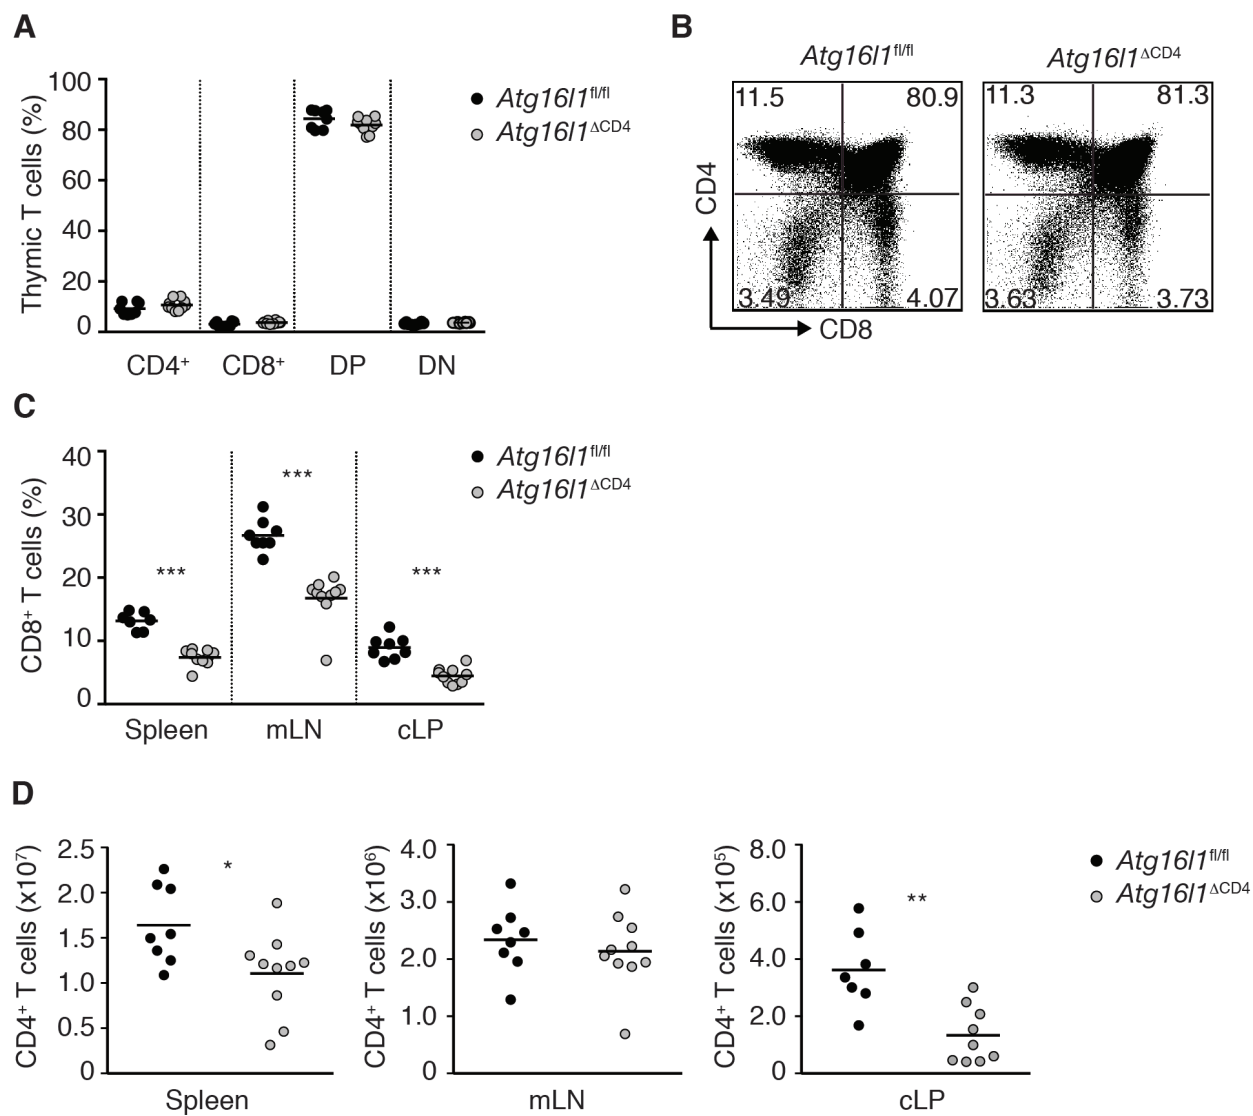

Supplement: supp [file elife_poa_e12444_Figure_2_figure_supplement_1.pdf › elife_poa_e12444_Figure_2_figure_supplement_1.pdf]

**A**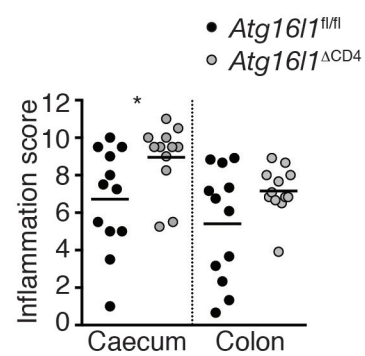**B**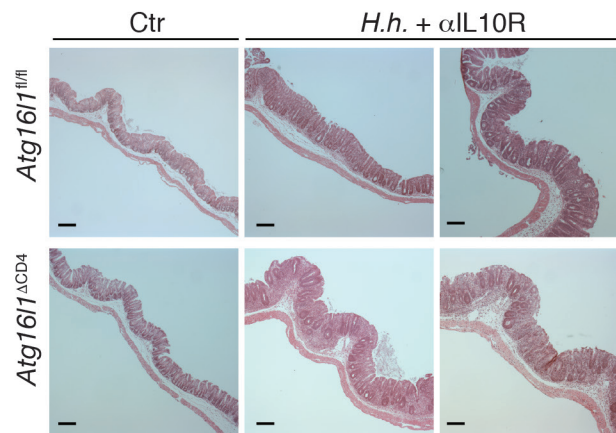**C**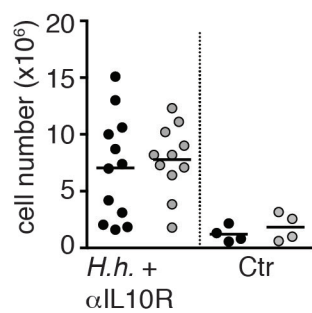**D**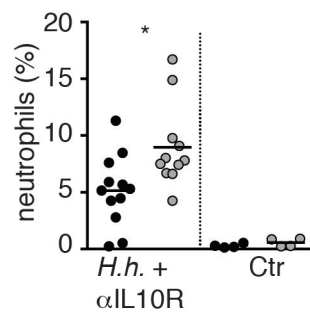**E**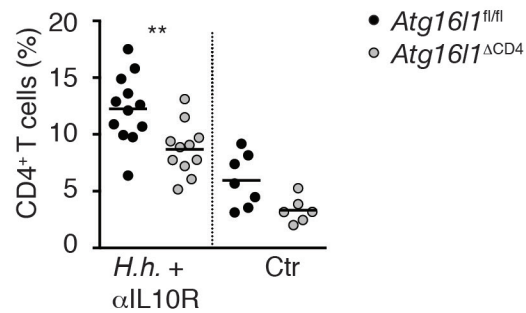

Supplement: supp [file elife_poa_e12444_Figure_2_figure_supplement_2.pdf › elife_poa_e12444_Figure_2_figure_supplement_2.pdf]

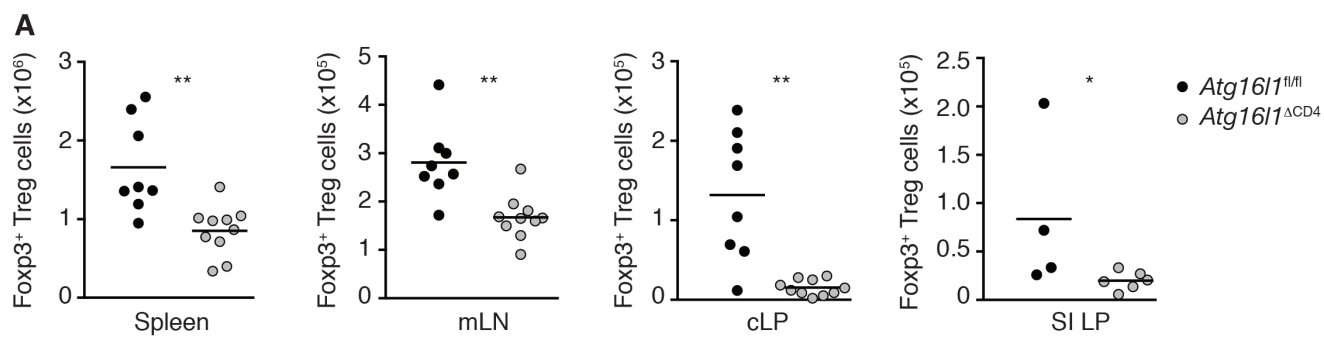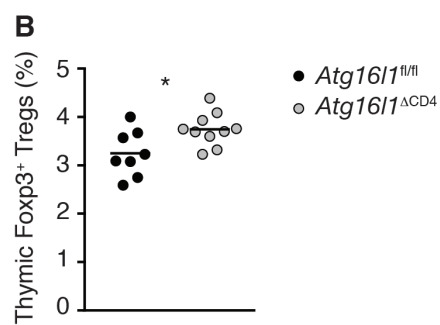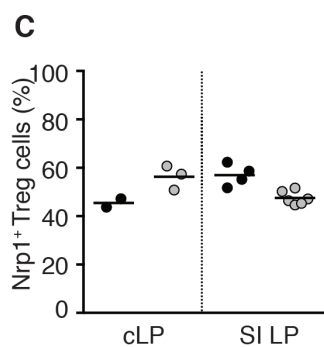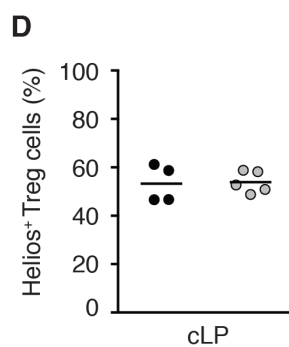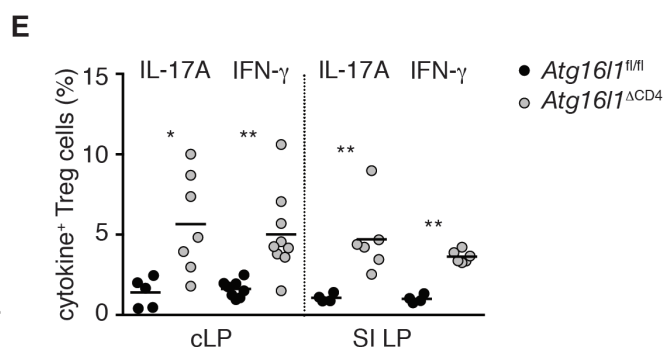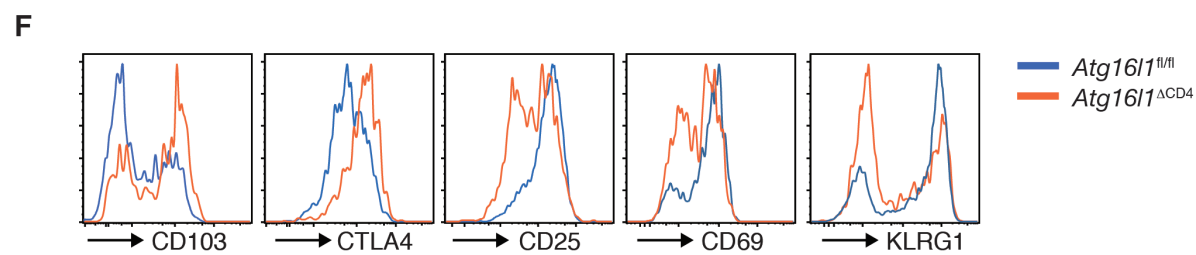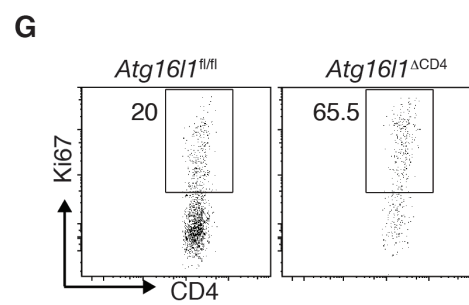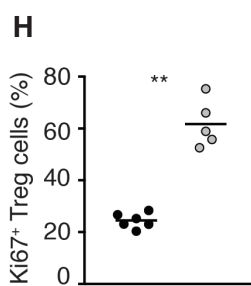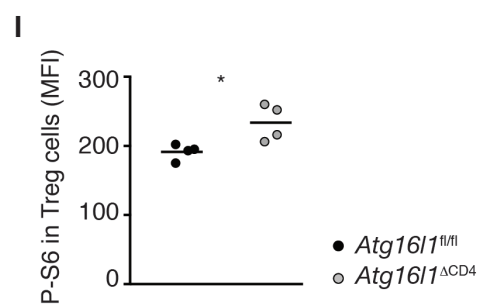

Supplement: supp [file elife_poa_e12444_Figure_2_figure_supplement_4.pdf › elife_poa_e12444_Figure_2_figure_supplement_4.pdf]

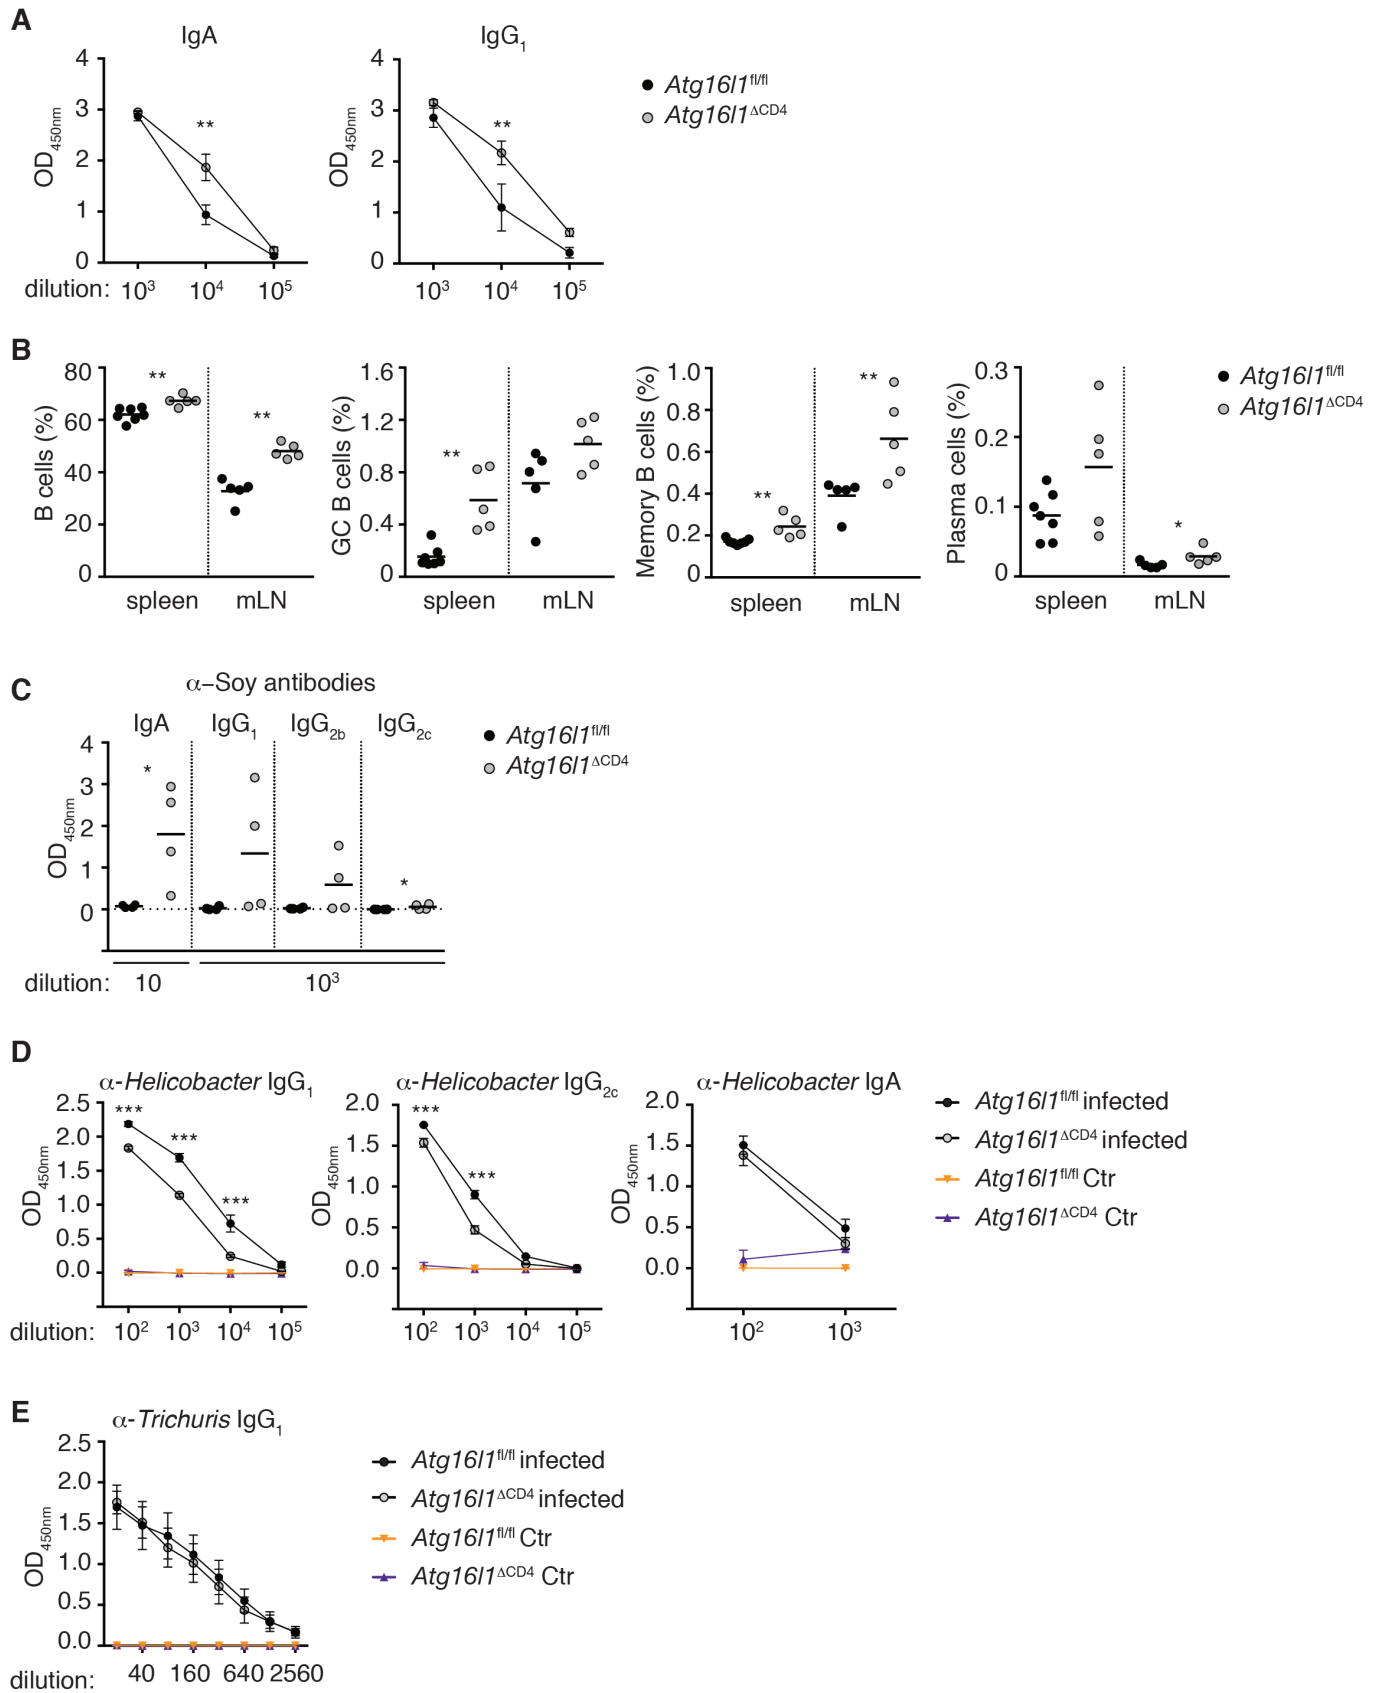

Supplement: supp [file elife_poa_e12444_Figure_3_figure_supplement_1.pdf › elife_poa_e12444_Figure_3_figure_supplement_1.pdf]

**A**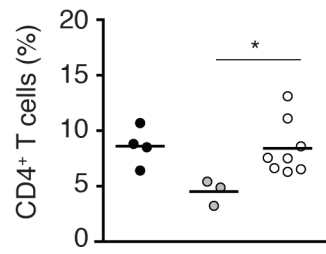**B**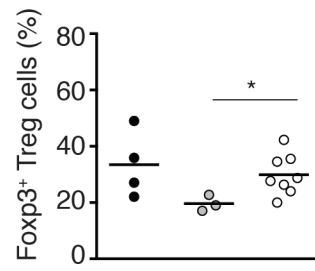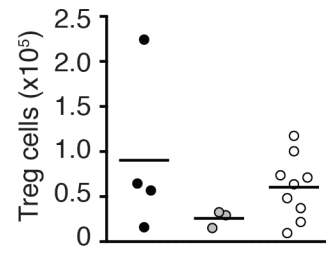**C**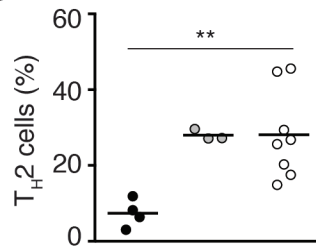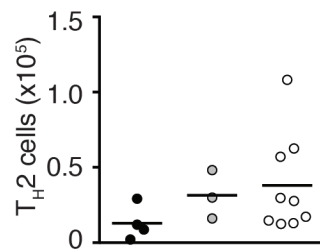

● *Atg16l1*<sup>fl/fl</sup>  
○ *Atg16l1*<sup>ΔCD4</sup>  
○ *Atg16l1*<sup>ΔCD4</sup> + WT naive CD4<sup>+</sup> T cells

Supplement: supp [file elife_poa_e12444_Figure_5_figure_supplement_1.pdf › elife_poa_e12444_Figure_5_figure_supplement_1.pdf]

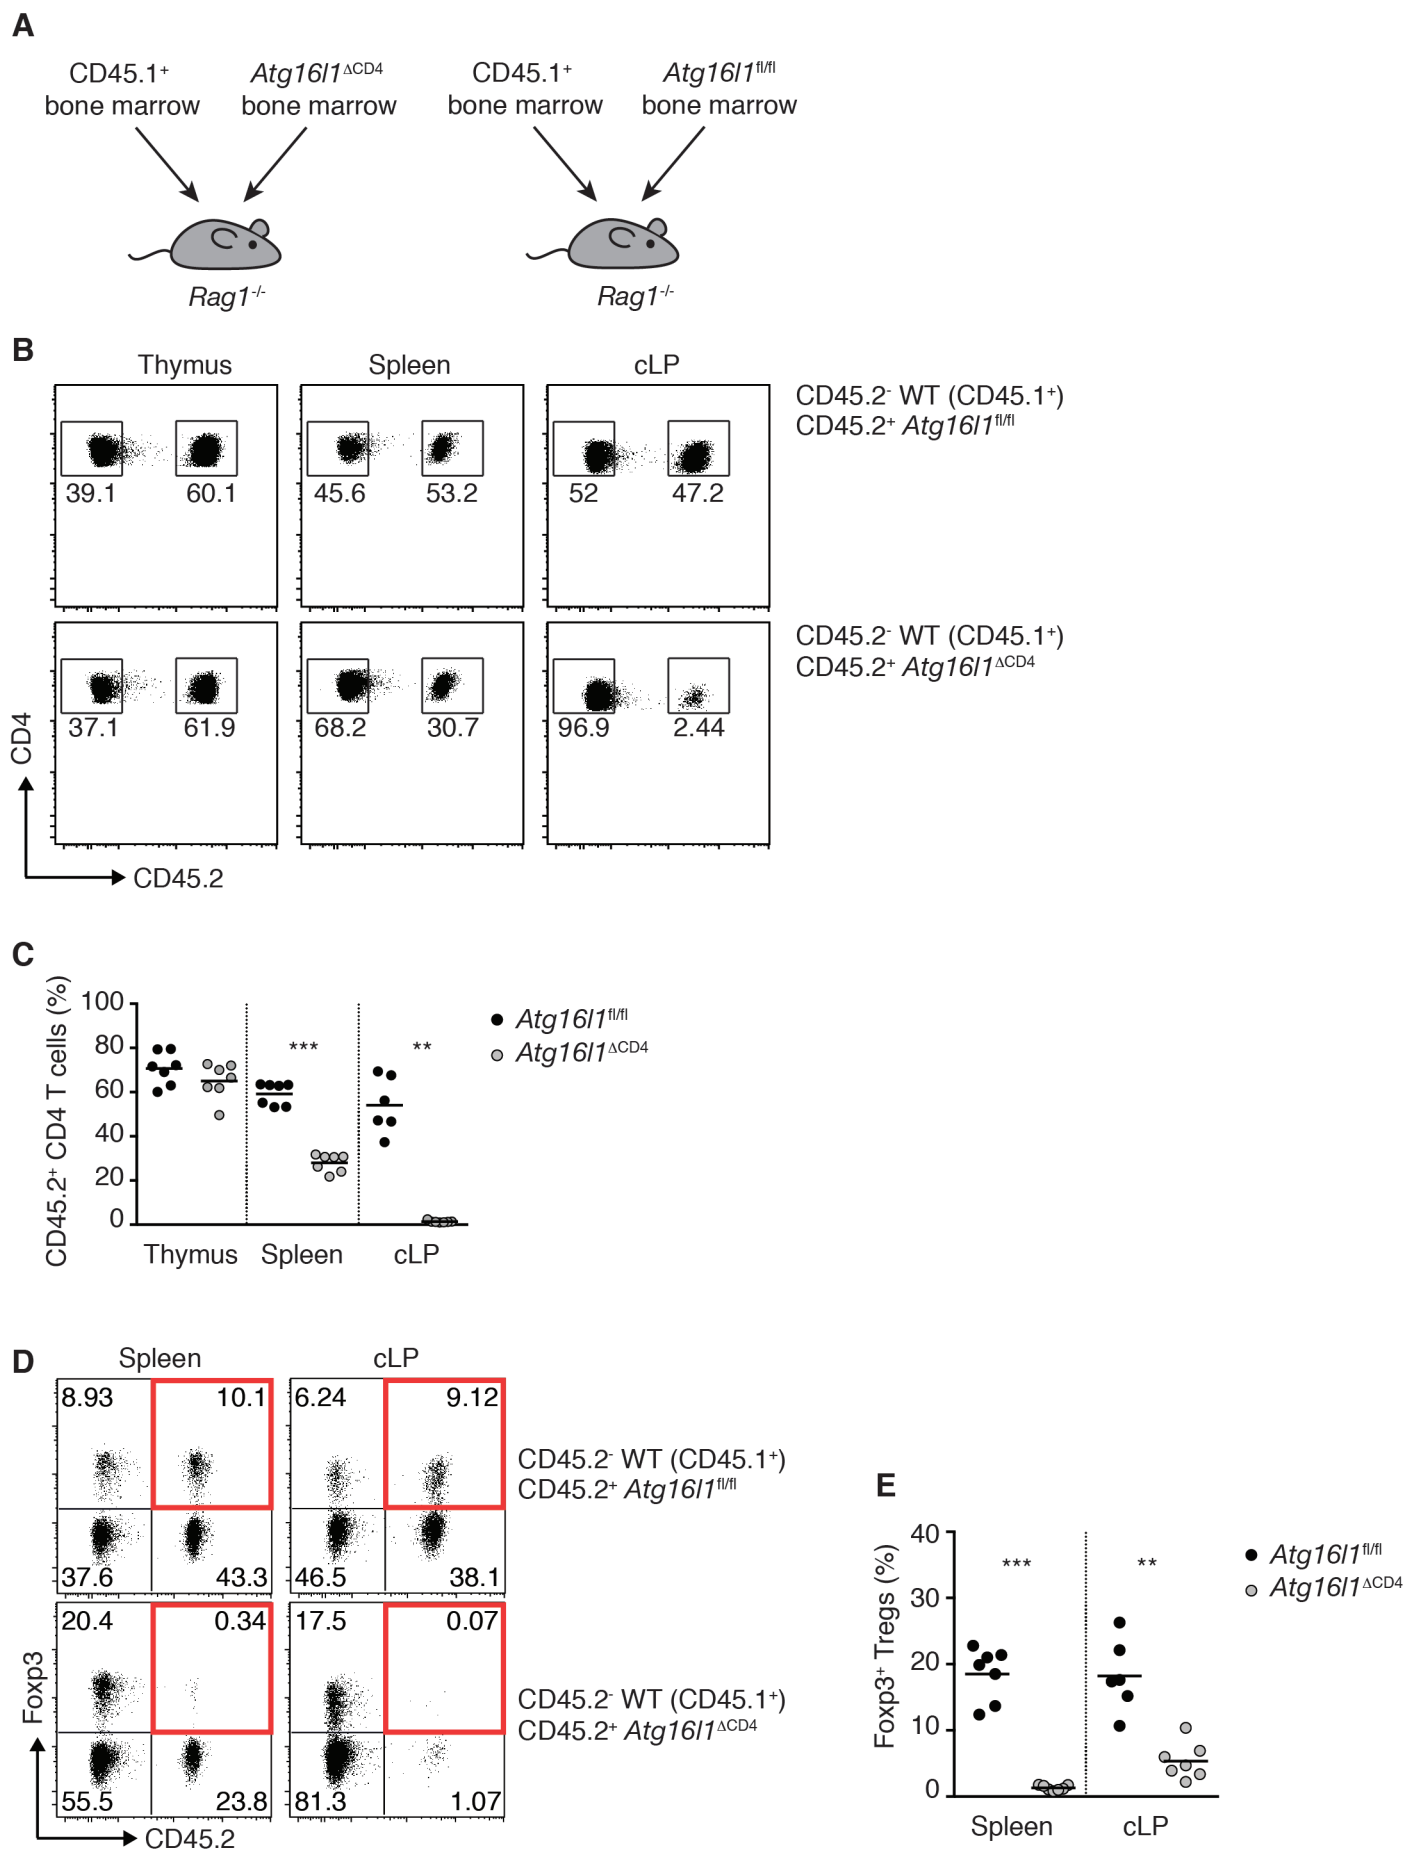

Supplement: supp [file elife_poa_e12444_Figure_6_figure_supplement_1.pdf › elife_poa_e12444_Figure_6_figure_supplement_1.pdf]

**A**

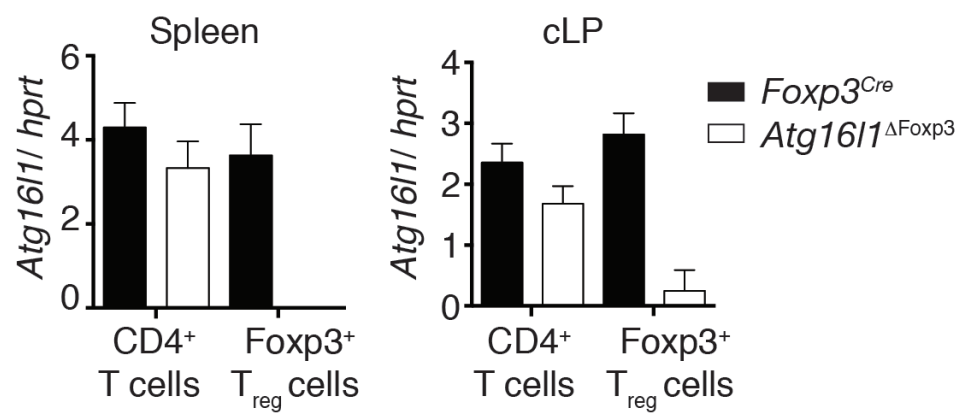

Supplement: supp [file elife_poa_e12444_Figure_6_figure_supplement_2.pdf › elife_poa_e12444_Figure_6_figure_supplement_2.pdf]

**A**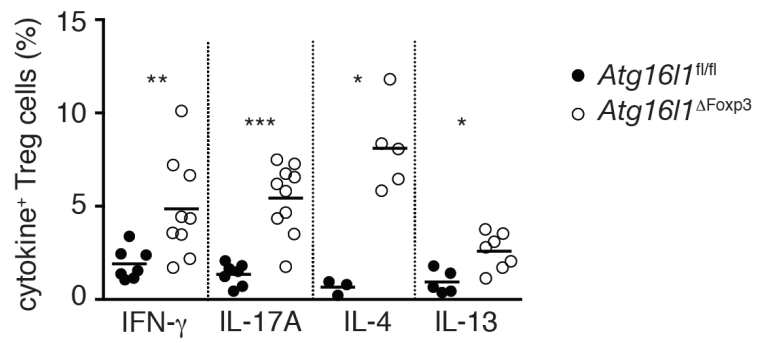**B**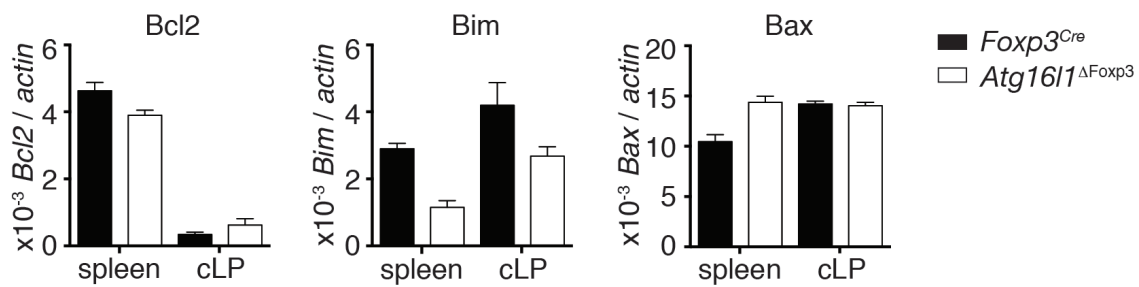

Supplement: supp [file elife_poa_e12444_Figure_8_figure_supplement_1.pdf › elife_poa_e12444_Figure_8_figure_supplement_1.pdf]

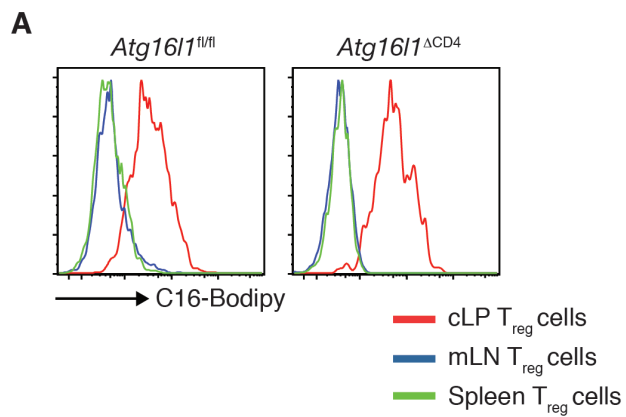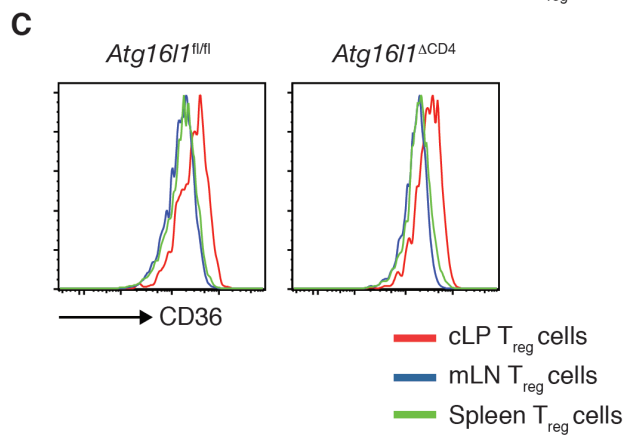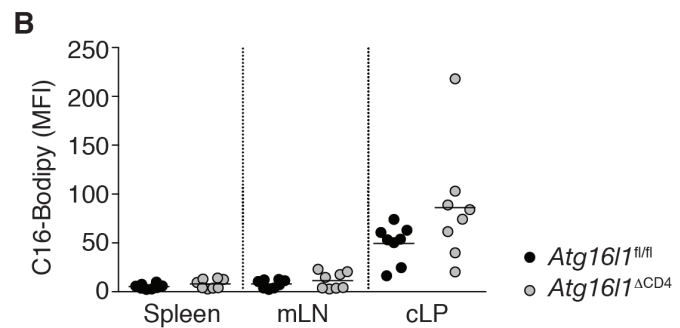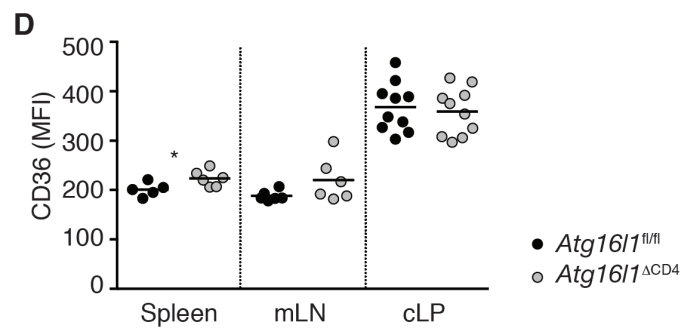

Supplement: supp [file elife_poa_e12444_Figure_8_figure_supplement_2.pdf › elife_poa_e12444_Figure_8_figure_supplement_2.pdf]

**A**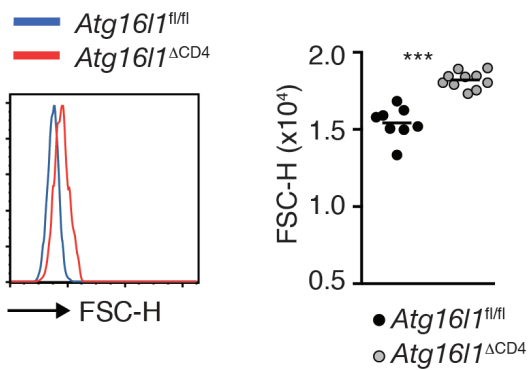**B**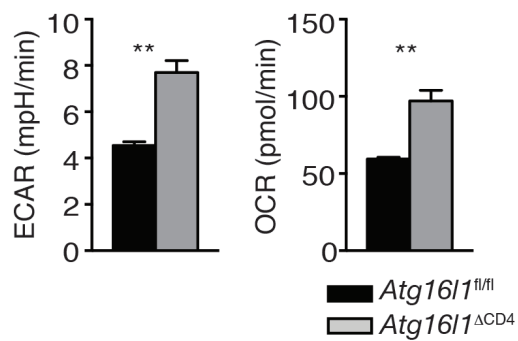**C**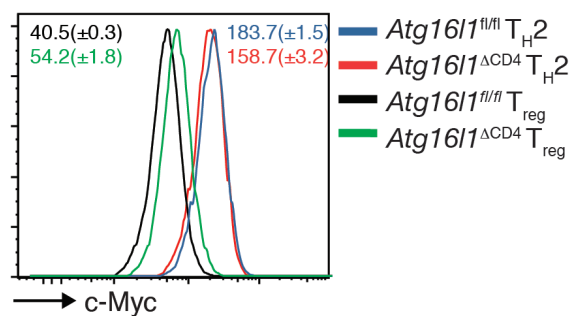**D**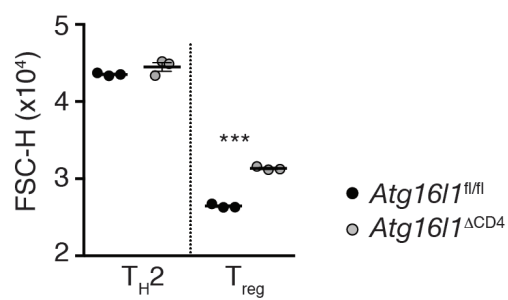**E**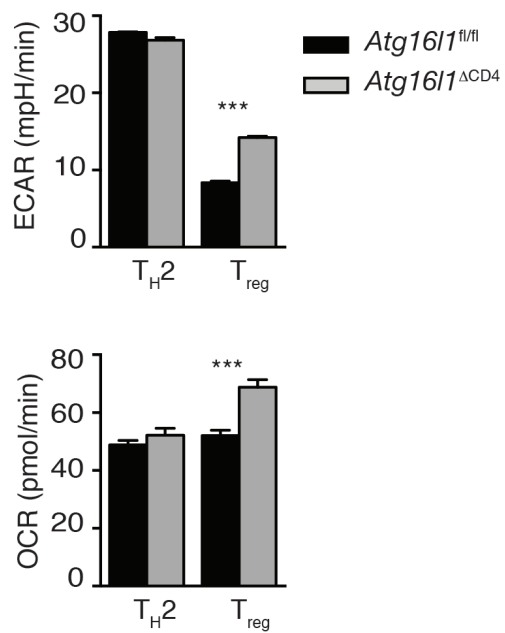**F**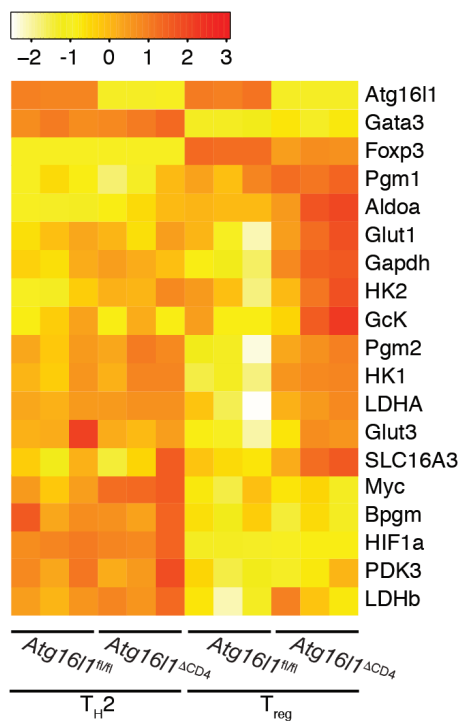

Supplement: supp [file elife_poa_e12444_Figure_8_figure_supplement_3.pdf › elife_poa_e12444_Figure_8_figure_supplement_3.pdf]
